# Supplementary material for: A Comparison of Spatial and Phenotypic Immune Profiles of Pancreatic Ductal Adenocarcinoma and Its Precursor Lesions
Source: MDPI journal article supplement (doi:10.3390/ijms25052953), 2024-03-03

## **Supplemental Materials**

**Table S1. Characteristics of the different pancreatic cancer precursor lesions and pancreatic adenocarcinoma.**

|                                         | MCN                              | IPMN                             | PanIN                            | PDAC                             |
|-----------------------------------------|----------------------------------|----------------------------------|----------------------------------|----------------------------------|
| <b>Cystic</b>                           | yes                              | yes                              | no                               | no                               |
| <b>Location</b>                         | body/tail>head                   | head>body/tail                   | head=body=tail                   | head>body/tail                   |
| <b>Pancreatic duct communication</b>    | no                               | yes                              | yes                              | yes                              |
| <b>Association with invasive cancer</b> | rarely                           | yes                              | yes                              | -                                |
| <b>Cytologic atypia</b>                 | low grade – high grade           | low grade – high grade           | low grade – high grade           | -                                |
| <b>Molecular mutations</b>              | KRAS, SMAD4, TP53                | GNAS, KRAS, RNF43, TP53          | KRAS, TP53, SMAD4/DPC4, BRCA2    | KRAS, TP53, CDKN2A, SMAD4        |
| <b>Age, decade</b>                      | 4 <sup>th</sup> -5 <sup>th</sup> | 6 <sup>th</sup> -7 <sup>th</sup> | 6 <sup>th</sup> -7 <sup>th</sup> | 7 <sup>th</sup> -8 <sup>th</sup> |
| <b>Sex predilection</b>                 | F>>>M                            | M>F                              | F>M                              | M>F                              |

**Figure S1. Composite images of multiplex fluorescent immunohistochemistry.** A - F. Composite multispectral images of cystic lesions MCN (A) and IPMN (B), IPMN-associated PDAC (IAPA) (C), normal pancreatic tissue (NNPT) (D), PanIN (E), and PDAC (F) (original magnification, x20). White, ECs; green, CD4+ (helper) T cells; yellow, CD8+ (cytotoxic) T cells; red, Tregs; magenta, APCs.

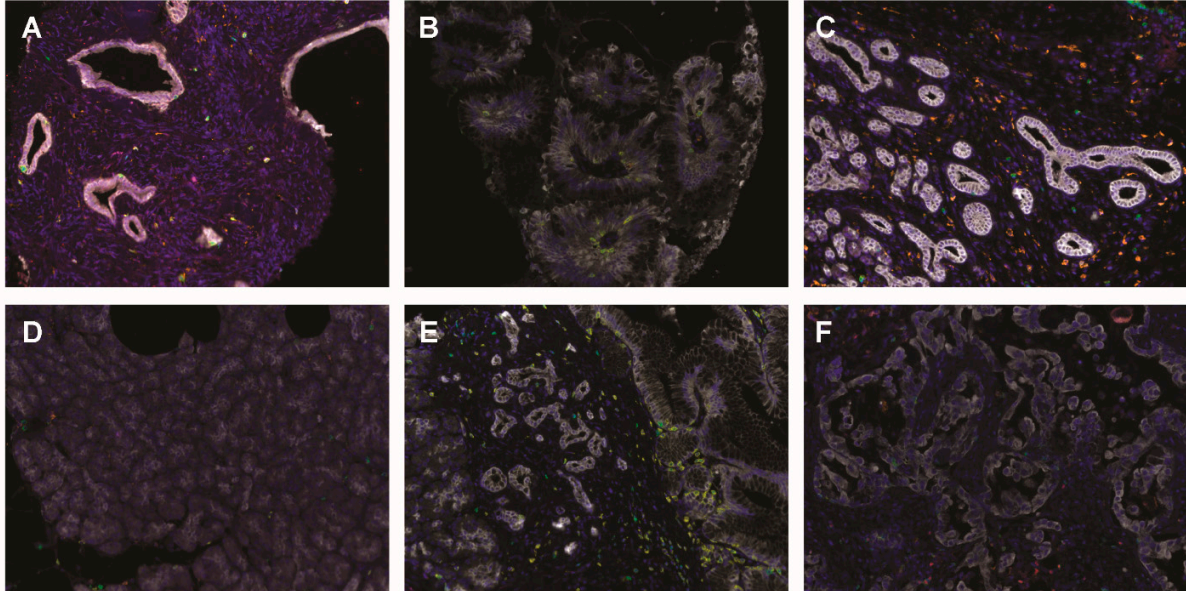

**Figure S2. Composite image of PD-L1 staining (PD-L1+ cells) in PDAC.**

White, ECs; green, CD4+ (helper) T cells; yellow, CD8+ (cytotoxic) T cells; red, Tregs; magenta, APCs; blue, PD-L1 positive cells (original magnification, x20).

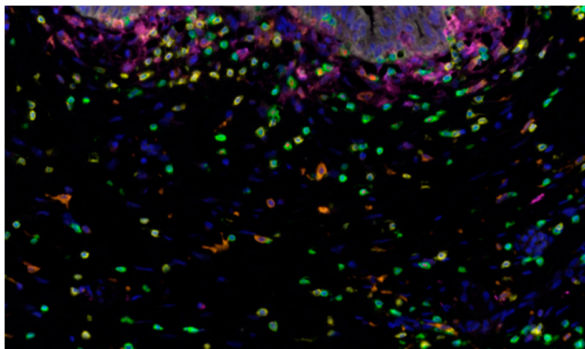

**Figure S3. Schema depicting cells that are engaged or non-engaged.** Cells are considered engaged if they are within a 15  $\mu\text{m}$  radius from the center of a nucleus of a T cell or within a 40  $\mu\text{m}$  radius from the center of a nucleus of another cell. If cells are outside that radius, they are considered non-engaged.

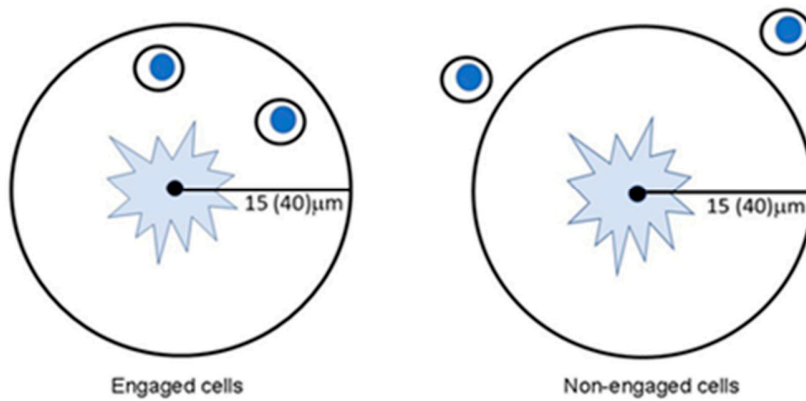

**Figure S4.** Engagement of CD8+ T cells with PD-L1 positive APCs in *cystic* lesions (A) and *non-cystic* lesions (C). Engagement of CD8+ T cells with PD-L1 positive ECs in *cystic* lesions (B) and *non-cystic* lesions (D). Normal pancreatic tissue used as a reference. \*  $p \leq 0.05$ ; \*\*  $p \leq 0.01$ ; \*\*\*  $p \leq 0.001$ ; \*\*\*\*  $p \leq 0.0001$ .

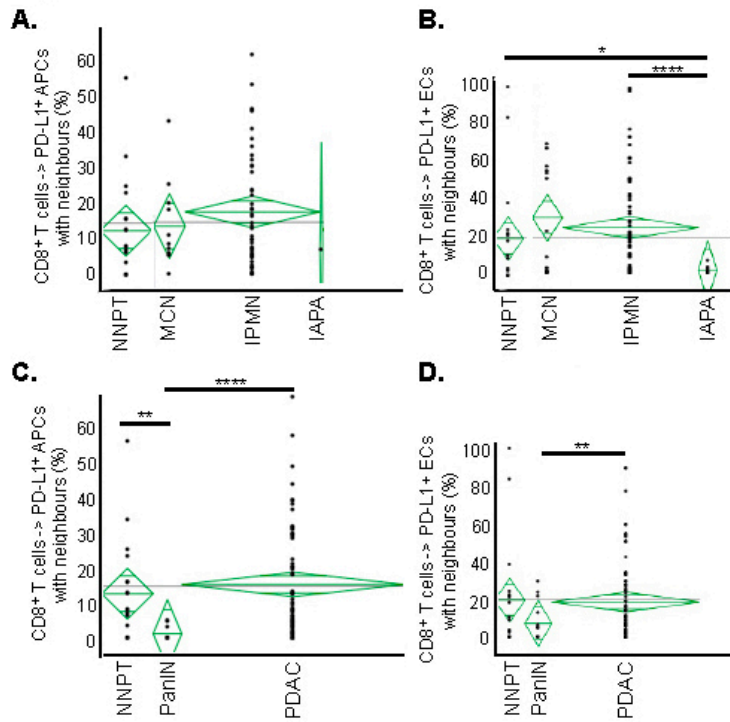

**Table S2. Numbers of tissue samples of each tissue type used for the individual experiments.**  
Individual experiments are referred as to figures/images.

| Figure | Image/Graph | NNPT | MCN | IPMN | IAPA | PanIN | PDAC |
|--------|-------------|------|-----|------|------|-------|------|
| 1      | G, J        | 36   | 17  | 71   | 8    | 29    | 104  |
|        | H, K        | 36   | 17  | 71   | 8    | 29    | 104  |
|        | I, L        | 36   | 17  | 71   | 8    | 29    | 104  |
| 2      | A, C        | 21   | 16  | 49   | 8    | 20    | 100  |
|        | B, D        | 21   | 16  | 49   | 8    | 20    | 100  |
| 3      | A, C        | 36   | 17  | 71   | 8    | 29    | 106  |
|        | B, D        | 19   | 12  | 47   | 2    | 10    | 80   |
| 4      | A, G        | 36   | 17  | 70   | 8    | 26    | 96   |
|        | B, H        | 36   | 15  | 66   | 8    | 27    | 98   |
|        | C, I        | 15   | 9   | 37   | 1    | 5     | 43   |
|        | D, J        | 11   | 8   | 35   | 8    | 13    | 75   |
|        | E, K        | 34   | 14  | 67   | 8    | 28    | 97   |
|        | F, L        | 36   | 15  | 71   | 8    | 29    | 93   |
| 5      | A, C        | 36   | 14  | 72   | 8    | 28    | 104  |
|        | B, D        | 16   | 8   | 45   | 6    | 15    | 64   |
| S4     | A, C        | 14   | 11  | 44   | 1    | 4     | 69   |
|        | B, D        | 12   | 11  | 50   | 5    | 9     | 58   |

**Figure S5. Neighbourhood analysis.** The steps below represent the different steps we used to determine nearest neighbors. One representative example is shown.

First-order statistics

All cells

Number of cells: 2035

Average intensity: 0.006 cells per square micron

Frequency and intensity per phenotype:

|                   | frequency | proportion | intensity |
|-------------------|-----------|------------|-----------|
| Cytotoxic T cells | 217       | 0.107      | 0.001     |
| Epithelial cells  | 346       | 0.170      | 0.001     |
| APC               | 119       | 0.058      | 0.000     |
| Other cell types  | 1299      | 0.638      | 0.004     |
| T helper cells    | 4         | 0.002      | 0.000     |
| T regs            | 50        | 0.025      | 0.000     |

Cell and phenotype locations:

1) Locations of all cells

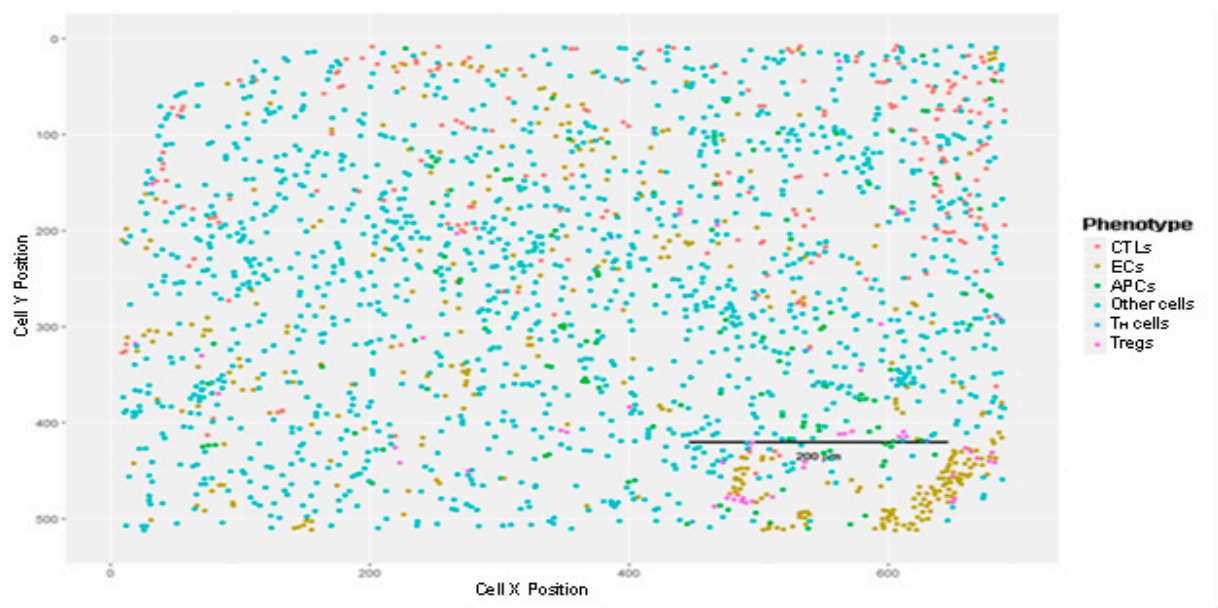

## 2) Individual cells

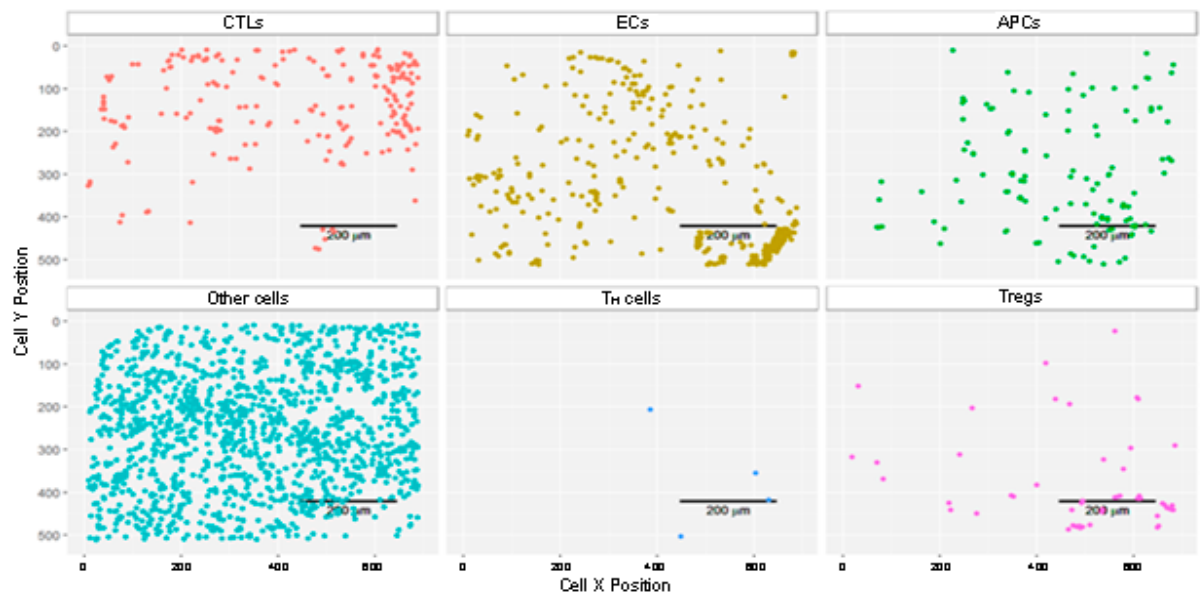

## 3) Nearest neighbours, selected phenotype

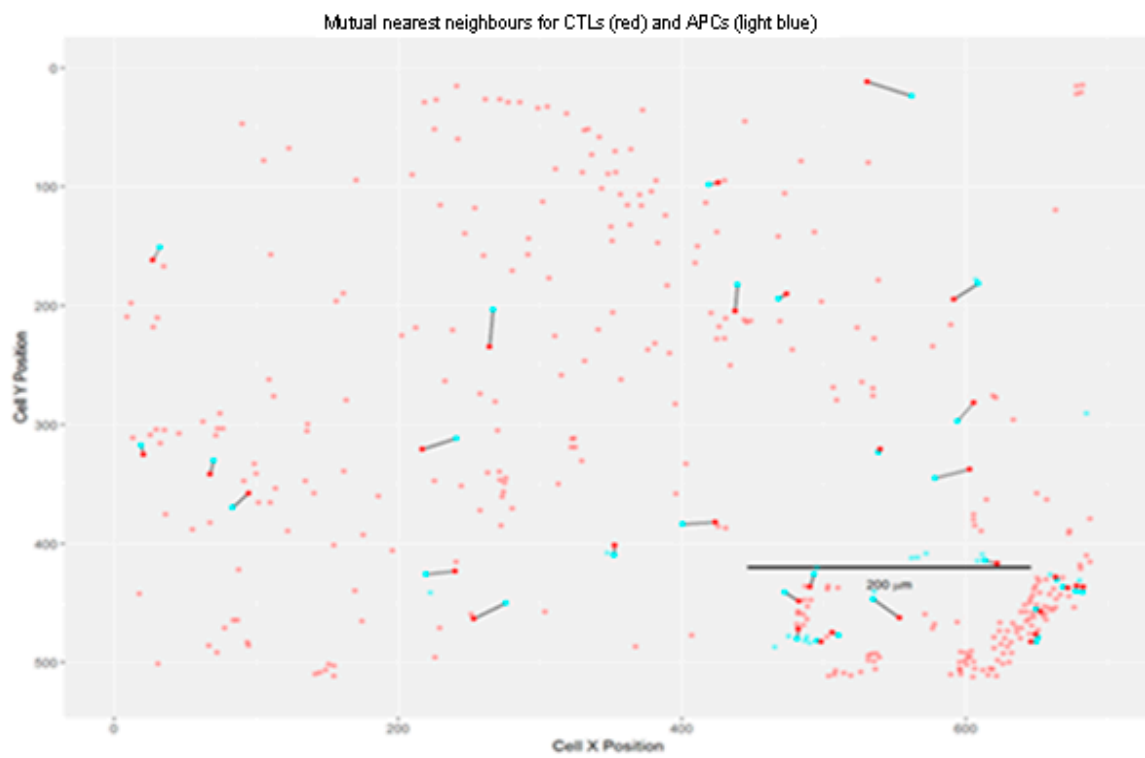

Supplement: s1 [file s1]
